# Supplementary material for: Morphometric Analysis of Coptotermes spp. Soldier Caste (Blattodea: Rhinotermitidae) in Indonesia and Evidence of Coptotermes gestroi Extreme Head-Capsule Shapes
Source: Insects. 2021 May 20;12(5):477. doi: 10.3390/insects12050477 (PMC8160883; doi:10.3390/insects12050477)
Supplement: Supplementary file 1 [file insects-12-00477-s001.zip]

Archive with 19 entries (19 files):
- Figure S1.pdf
- Figure S2.pdf
- Table S1.pdf
- Table S10.pdf
- Table S11.pdf
- Table S12.pdf
- Table S13.pdf
- Table S14.pdf
- Table S15.pdf
- Table S16.pdf
- Table S17 & S18.pdf
- Table S2.pdf
- Table S3.pdf
- Table S4.pdf
- Table S5.pdf
- Table S6.pdf
- Table S7.pdf
- Table S8.pdf
- Table S9.pdf
