# Supplementary material for: Morphometric Analysis of Coptotermes spp. Soldier Caste (Blattodea: Rhinotermitidae) in Indonesia and Evidence of Coptotermes gestroi Extreme Head-Capsule Shapes
Source: Insects. 2021 May 20;12(5):477. doi: 10.3390/insects12050477 (PMC8160883; doi:10.3390/insects12050477)
Supplement: Supplementary file 1 [file insects-12-00477-s001.zip › Table S1.pdf]

Table S1. Measurements of 5 morphospecies observed in this study. (\*numbers, \*\*\*not subjected into multivariate analysis)

|    | Characters (µm)                                | <i>C. curvignathus</i> (n = 66; **112) |         |           | <i>C. gestroi</i> (n = 84; **152) |         |           | <i>C. sepangensis</i> (n = 63; **126) |         |           | <i>C. kalshoveni</i> (n = 5; **8) |         |           |
|----|------------------------------------------------|----------------------------------------|---------|-----------|-----------------------------------|---------|-----------|---------------------------------------|---------|-----------|-----------------------------------|---------|-----------|
|    |                                                | Mean                                   | Min.    | Max.      | Mean                              | Min.    | Max.      | Mean                                  | Min.    | Max.      | Mean                              | Min.    | Max.      |
| 1  | Head length to the tip mandible (HLM)          | 2396.83 ± 19.24                        | 2031.00 | - 2677.00 | 2017.36 ± 15.66                   | 1754.00 | - 2322.00 | 1726.05 ± 13.98                       | 1314.00 | - 1928.00 | 1635.20 ± 31.50                   | 1564.00 | - 1733.00 |
| 2  | Head length to the base mandible (HLBM)        | 1568.62 ± 10.66                        | 1380.00 | - 1745.00 | 1303.67 ± 10.99                   | 1100.00 | - 1510.00 | 1165.27 ± 6.99                        | 997.00  | - 1320.00 | 1107.00 ± 12.16                   | 1066.00 | - 1127.00 |
| 3  | Base mandible to the tip mandible length (BML) | 827.09 ± 13/78                         | 550.00  | - 1069.00 | 709.33 ± 7.36                     | 564.00  | - 892.00  | 567.70 ± 7.38                         | 422.00  | - 705.00  | 526.20 ± 27.22                    | 460.00  | - 606.00  |
| 4  | Head width (HW)                                | 1405.97 ± 9.20                         | 1205.00 | - 1531.00 | 1093.17 ± 11.02                   | 890.00  | - 1322.00 | 1009.71 ± 5.74                        | 830.00  | - 1143.00 | 976.40 ± 5.48                     | 964.00  | - 992.00  |
| 5  | Head width on the base mandible (HWBM)         | 789.11 ± 4.60                          | 711.00  | - 905.00  | 659.36 ± 5.04                     | 559.00  | - 763.00  | 545.90 ± 3.12                         | 465.00  | - 614.00  | 468.80 ± 8.13                     | 450.00  | - 492.00  |
| 6  | Head capsule seta (HCS)*                       | 42.48 ± 0.79                           | 31.00   | - 56.00   | 13.71 ± 0.39                      | 2.00    | - 23.00   | 18.52 ± 0.51                          | 13.00   | - 32.00   | 45.20 ± 3.84                      | 31.00   | - 53.00   |
| 7  | Fontanel width (FW)                            | 235.52 ± 3.07                          | 187.00  | - 294.00  | 184.71 ± 1.80                     | 132.00  | - 217.00  | 184.41 ± 1.81                         | 154.00  | - 217.00  | 180.60 ± 1.94                     | 174.00  | - 186.00  |
| 8  | Labrum maximum width (LbMxW)                   | 315.92 ± 2.58                          | 228.00  | - 349.00  | 277.81 ± 3.27                     | 202.00  | - 333.00  | 268.44 ± 33.37                        | 185.00  | - 2331.00 | 221.20 ± 3.67                     | 213.00  | - 231.00  |
| 9  | Labrum maximum length (LbMxL)                  | 404.55 ± 6.18                          | 279.00  | - 495.00  | 362.13 ± 4.64                     | 279.00  | - 459.00  | 259.71 ± 4.82                         | 157.00  | - 330.00  | 224.40 ± 9.34                     | 193.00  | - 248.00  |
| 10 | Labrum Paraterminal Setae Length (LbPtSL)**    | 32.56 ± 1.58                           | 8.90    | - 130.30  | 14.11 ± 0.31                      | 5.20    | - 24.41   | 30.17 ± 1.22                          | 9.65    | - 78.80   | 13.43 ± 0.72                      | 10.48   | - 15.83   |
| 11 | Left mandible length (LML)                     | 1067.05 ± 5.29                         | 962.00  | - 1164.00 | 846.56 ± 5.96                     | 730.00  | - 976.00  | 744.48 ± 5.84                         | 588.00  | - 830.00  | 655.60 ± 5.11                     | 645.00  | - 672.00  |
| 12 | Head height (HHt)                              | 998.91 ± 7.92                          | 869.00  | - 1155.00 | 836.14 ± 7.76                     | 711.00  | - 982.00  | 792.57 ± 3.80                         | 732.00  | - 859.00  | 738.00 ± 7.91                     | 719.00  | - 767.00  |
| 13 | Postmentum median length (PsMdL)               | 949.24 ± 8.67                          | 735.00  | - 1050.00 | 871.44 ± 6.43                     | 743.00  | - 1019.00 | 636.65 ± 7.12                         | 490.00  | - 732.00  | 590.60 ± 21.33                    | 521.00  | - 647.00  |
| 14 | Postmentum maximum width (PsMxW)               | 421.86 ± 2.54                          | 374.00  | - 476.00  | 383.00 ± 3.11                     | 318.00  | - 450.00  | 337.37 ± 2.23                         | 305.00  | - 392.00  | 329.60 ± 3.37                     | 319.00  | - 339.00  |
| 15 | Postmentum minimum width (PsMnW)               | 236.30 ± 1.73                          | 205.00  | - 264.00  | 248.50 ± 3.20                     | 199.00  | - 321.00  | 227.63 ± 1.76                         | 185.00  | - 257.00  | 257.00 ± 4.20                     | 246.00  | - 267.00  |
| 16 | Postmentum anterior width (PsAW)               | 248.76 ± 2.55                          | 196.00  | - 297.00  | 222.76 ± 2.54                     | 119.00  | - 267.00  | 188.51 ± 1.79                         | 156.00  | - 225.00  | 193.80 ± 5.91                     | 178.00  | - 211.00  |
| 17 | Postmentum seta (PsS)*                         | 10.45 ± 0.40                           | 4.00    | - 18.00   | 6.32 ± 0.24                       | 1.00    | - 15.00   | 8.84 ± 0.27                           | 4.00    | - 15.00   | 12.20 ± 0.37                      | 11.00   | - 13.00   |
| 18 | Pronotum median length (PrMdL)                 | 516.17 ± 6.26                          | 407.00  | - 585.00  | 396.71 ± 4.68                     | 302.00  | - 496.00  | 355.51 ± 3.82                         | 296.00  | - 421.00  | 339.00 ± 4.24                     | 325.00  | - 351.00  |
| 19 | Pronotum maximum length (PrMxL)                | 576.05 ± 6.45                          | 458.00  | - 649.00  | 428.62 ± 5.20                     | 320.00  | - 538.00  | 394.97 ± 4.64                         | 323.00  | - 473.00  | 387.80 ± 4.07                     | 376.00  | - 397.00  |
| 20 | Pronotum maximum width (PrMxW)                 | 992.39 ± 9.01                          | 813.00  | - 1091.00 | 769.99 ± 9.98                     | 579.00  | - 1001.00 | 699.38 ± 6.29                         | 613.00  | - 818.00  | 647.20 ± 9.35                     | 613.00  | - 665.00  |
| 21 | Pronotum seta*(PrS)                            | 80.09 ± 1.36                           | 61.00   | - 113.00  | 23.54 ± 0.47                      | 14.00   | - 36.00   | 38.95 ± 0.73                          | 26.00   | - 58.00   | 55.60 ± 3.44                      | 46.00   | - 64.00   |
| 22 | Pronotum margin seta (PrMS)***                 | 44.79 ± 0.74                           | 34.00   | - 63.00   | 23.11 ± 0.42                      | 13.00   | - 33.00   | 26.40 ± 0.52                          | 18.00   | - 36.00   | 39.20 ± 2.15                      | 34.00   | - 46.00   |
| 23 | Pronotum disc seta (PrMS)***                   | 35.30 ± 1.02                           | 17.00   | - 54.00   | 0.54 ± 0.13                       | 0.00    | - 5.00    | 12.43 ± 0.45                          | 6.00    | - 25.00   | 16.40 ± 1.96                      | 10.00   | - 21.00   |
| 24 | Mesonotum maximum width (MsMxW)                | 874.97 ± 6.36                          | 747.00  | - 949.00  | 703.20 ± 7.41                     | 559.00  | - 871.00  | 682.86 ± 5.41                         | 610.00  | - 793.00  | 651.20 ± 6.64                     | 638.00  | - 676.00  |
| 25 | Metanotum maximum width (MtMxW)                | 994.24 ± 6.85                          | 870.00  | - 1118.00 | 822.65 ± 9.79                     | 651.00  | - 1034.00 | 793.84 ± 4.87                         | 728.00  | - 880.00  | 764.20 ± 8.02                     | 740.00  | - 783.00  |

Table S1. Measurements of 5 morphospecies observed in this study. \*numbers (continued)

|    | Characters (µm)                            | <i>C. curvignathus</i> (n = 76) |         |           | <i>C. gestroi</i> (n = 84) |         |           | <i>C. sepangensis</i> (n = 63) |         |           | <i>C. kalshoveni</i> (n = 5) |         |           |
|----|--------------------------------------------|---------------------------------|---------|-----------|----------------------------|---------|-----------|--------------------------------|---------|-----------|------------------------------|---------|-----------|
|    |                                            | Mean                            | Min.    | Max.      | Mean                       | Min.    | Max.      | Mean                           | Min.    | Max.      | Mean                         | Min.    | Max.      |
| 26 | Hind femora length (HiFL)                  | 1068.26 ± 7.76                  | 873.00  | - 1183.00 | 830.75 ± 8.95              | 547.00  | - 1040.00 | 764.48 ± 6.10                  | 541.00  | - 866.00  | 745.60 ± 14.85               | 710.00  | - 783.00  |
| 27 | Hind tibia length (HiTL)                   | 1187.65 ± 8.78                  | 1037.00 | - 1368.00 | 915.48 ± 10.83             | 709.00  | - 1114.00 | 857.62 ± 5.42                  | 784.00  | - 973.00  | 824.80 ± 11.92               | 796.00  | - 855.00  |
| 28 | Total body length without Head (TBLH)      | 3159.80 ± 95.97                 | 1803.00 | - 4717.00 | 3016.96 ± 46.48            | 2141.00 | - 3951.00 | 2102.97 ± 54.68                | 1294.00 | - 3541.00 | 1578.00 ± 157.96             | 1188.00 | - 2078.00 |
| 29 | Head - mandible width difference (ΔHMW)*** | 501.58 ± 9.72                   | 347.00  | - 680.00  | 457.11 ± 8.34              | 307.00  | - 712.00  | 420.79 ± 6.25                  | 296.00  | - 547.00  | 451.40 ± 11.47               | 411.00  | - 479.00  |
| 30 | Head length - head width (ΔHLHW)***        | 162.65 ± 5.55                   | 48.00   | - 310.00  | 210.50 ± 5.45              | 44.00   | - 313.00  | 155.56 ± 4.14                  | 73.00   | - 241.00  | 130.60 ± 10.71               | 102.00  | - 162.00  |
| 31 | Head index (HW/HLBM)***                    | 0.90 ± 0.00                     | 0.82    | - 0.97    | 0.84 ± 0.00                | 0.77    | - 0.97    | 0.87 ± 0.00                    | 0.80    | - 0.93    | 0.88 ± 0.01                  | 0.86    | - 0.90    |
| 32 | Head contraction index (HW/HWBM)***        | 0.56 ± 0.00                     | 0.52    | - 0.65    | 0.61 ± 0.00                | 0.52    | - 0.74    | 0.54 ± 0.00                    | 0.49    | - 0.59    | 0.48 ± 0.01                  | 0.46    | - 0.50    |
| 33 | Mandible index (LML/HLBM)***               | 0.68 ± 0.00                     | 0.59    | - 0.76    | 0.65 ± 0.00                | 0.51    | - 0.73    | 0.64 ± 0.00                    | 0.52    | - 0.70    | 0.59 ± 0.01                  | 0.57    | - 0.61    |
| 34 | Postmentum index (PsNW/PsMW)***            | 0.56 ± 0.00                     | 0.47    | - 0.62    | 0.65 ± 0.00                | 0.55    | - 0.78    | 0.68 ± 0.00                    | 0.58    | - 0.75    | 0.78 ± 0.01                  | 0.74    | - 0.82    |
| 35 | Pronotum index (PrMW/HW)***                | 0.71 ± 0.00                     | 0.63    | - 0.75    | 0.70 ± 0.00                | 0.63    | - 0.81    | 0.69 ± 0.00                    | 0.64    | - 0.84    | 0.66 ± 0.01                  | 0.64    | - 0.69    |
| 36 | Mesonotum index (MsMW/PrMW)***             | 0.92 ± 0.01                     | 0.82    | - 1.16    | 0.94 ± 0.01                | 0.83    | - 1.10    | 0.98 ± 0.00                    | 0.91    | - 1.04    | 1.01 ± 0.01                  | 0.97    | - 1.04    |
| 37 | Metanotum index (MtMW/PrMW)***             | 1.01 ± 0.01                     | 0.92    | - 1.13    | 1.00 ± 0.01                | 0.89    | - 1.14    | 1.02 ± 0.02                    | 0.83    | - 1.23    | 1.18 ± 0.01                  | 1.16    | - 1.21    |

Table S1. Measurements of 5 morphospecies observed in this study. \*numbers (continued)

|    | Characters (µm)                                | C. elisae (n = 10; **20) |      |   |       |
|----|------------------------------------------------|--------------------------|------|---|-------|
|    |                                                | Mean                     | Min. |   | Max.  |
| 1  | Head length to the tip mandible (HLM)          | 2555.5 ± 51.52           | 2306 | - | 2709  |
| 2  | Head length to the base mandible (HLBM)        | 1621.2 ± 18.60           | 1538 | - | 1742  |
| 3  | Base mandible to the tip mandible length (BML) | 934.4 ± 44.46            | 702  | - | 1077  |
| 4  | Head width (HW)                                | 1489.6 ± 10.53           | 1444 | - | 1555  |
| 5  | Head width on the base mandible (HWBM)         | 844.3 ± 7.31             | 794  | - | 875   |
| 6  | Head capsule seta (HCS)*                       | 39.1 ± 1.41              | 33   | - | 48    |
| 7  | Fontanel width (FW)                            | 234.8 ± 3.22             | 221  | - | 245   |
| 8  | Labrum maximum width (LbMxW)                   | 349.2 ± 4.22             | 326  | - | 369   |
| 9  | Labrum maximum length (LbMxL)                  | 426.3 ± 5.19             | 393  | - | 444   |
| 10 | Labrum Paraterminal Setae Length (LbPtSL)**    | 31.6465 ± 4.46           | 13.7 | - | 105.2 |
| 11 | Left mandible length (LML)                     | 1059.6 ± 19.75           | 947  | - | 1159  |
| 12 | Head height (HHt)                              | 1052.6 ± 11.19           | 999  | - | 1087  |
| 13 | Postmentum median length (PsMdL)               | 1014.9 ± 11.20           | 959  | - | 1083  |
| 14 | Postmentum maximum width (PsMxW)               | 439.4 ± 12.62            | 329  | - | 466   |
| 15 | Postmentum minimum width (PsMnW)               | 248.4 ± 3.17             | 227  | - | 258   |
| 16 | Postmentum anterior width (PsAW)               | 241.5 ± 2.49             | 231  | - | 254   |
| 17 | Postmentum seta (PsS)*                         | 10.4 ± 0.88              | 6    | - | 15    |
| 18 | Pronotum median length (PrMdL)                 | 508.6 ± 4.66             | 484  | - | 531   |
| 19 | Pronotum maximum length (PrMxL)                | 573.9 ± 5.97             | 548  | - | 600   |
| 20 | Pronotum maximum width (PrMxW)                 | 1024 ± 6.89              | 997  | - | 1069  |
| 21 | Pronotum seta*(PrS)                            | 62.9 ± 1.42              | 57   | - | 71    |
| 22 | Pronotum margin seta (PrMS)***                 | 40.6 ± 1.00              | 37   | - | 45    |
| 23 | Pronotum disc seta (PrMS)***                   | 22.3 ± 0.82              | 18   | - | 26    |
| 24 | Mesonotum maximum width (MsMxW)                | 894.4 ± 5.64             | 872  | - | 926   |
| 25 | Metanotum maximum width (MtMxW)                | 1023.5 ± 6.46            | 996  | - | 1066  |

|    | Characters (µm)                            | C. elisae (n = 10) |      |   |      |
|----|--------------------------------------------|--------------------|------|---|------|
|    |                                            | Mean               | Min. |   | Max. |
| 26 | Hind femora length (HiFL)                  | 1116.6 ± 9.96      | 1070 | - | 1171 |
| 27 | Hind tibia length (HiTL)                   | 1238.9 ± 4.87      | 1223 | - | 1265 |
| 28 | Total body length without Head (TBLH)      | 2939.9 ± 94.99     | 2548 | - | 3362 |
| 29 | Head - mandible width difference (ΔHMW)*** | 561.6 ± 33.03      | 408  | - | 795  |
| 30 | Head length - head width (ΔHLHW)***        | 131.6 ± 19.19      | 25   | - | 214  |
| 31 | Head index (HW/HLBM)***                    | 0.9197 ± 0.01      | 0.88 | - | 0.98 |
| 32 | Head contraction index (HW/HWBM)***        | 0.5669 ± 0.00      | 0.55 | - | 0.59 |
| 33 | Mandible index (LML/HLBM)***               | 0.6551 ± 0.02      | 0.54 | - | 0.74 |
| 34 | Postmentum index (PsNW/PsMW)***            | 0.5702 ± 0.02      | 0.5  | - | 0.74 |
| 35 | Pronotum index (PrMW/HW)***                | 0.6876 ± 0.01      | 0.66 | - | 0.71 |
| 36 | Mesonotum index (MsMW/PrMW)***             | 0.8735 ± 0.00      | 0.85 | - | 0.89 |
| 37 | Metanotum index (MtMW/PrMW)***             | 0.9998 ± 0.01      | 0.97 | - | 1.03 |
