# Supplementary material for: Morphometric Analysis of Coptotermes spp. Soldier Caste (Blattodea: Rhinotermitidae) in Indonesia and Evidence of Coptotermes gestroi Extreme Head-Capsule Shapes
Source: Insects. 2021 May 20;12(5):477. doi: 10.3390/insects12050477 (PMC8160883; doi:10.3390/insects12050477)
Supplement: Supplementary file 1 [file insects-12-00477-s001.zip › Table S2.pdf]

Table S2. Rotated Component Matrix by Varimax. Two components and seven sets of character were explained. Total % of Variance covered 82.43%.

| Sets of Character          | Characters         | Component    |              |
|----------------------------|--------------------|--------------|--------------|
|                            |                    | 1            | 2            |
| Head Capsule Morphometric  | Zscore(Log10HWBM)  | <b>0.932</b> | 0.242        |
|                            | Zscore(Log10HLM)   | 0.922        | 0.276        |
|                            | Zscore(Log10HLBM)  | 0.896        | 0.377        |
|                            | Zscore(Log10HW)    | 0.848        | 0.497        |
|                            | Zscore(Log10BML)   | 0.845        | 0.130        |
|                            | Zscore(Log10HHt)   | 0.832        | 0.458        |
| Labium Morphometric        | Zscore(Log10PsMxW) | 0.918        | 0.176        |
|                            | Zscore(Log10PsMdL) | 0.898        | -0.013       |
|                            | Zscore(Log10PsAW)  | 0.840        | 0.150        |
| Trunk Morphometric         | Zscore(Log10PrMxW) | 0.875        | 0.438        |
|                            | Zscore(Log10PrMdL) | 0.864        | 0.426        |
|                            | Zscore(Log10PrMxL) | 0.829        | 0.494        |
|                            | Zscore(Log10MsMxW) | 0.800        | 0.528        |
|                            | Zscore(Log10MtMxW) | 0.793        | 0.485        |
|                            | Zscore(Log10TBLH)  | 0.766        | -0.159       |
| Head Features Morphometric | Zscore(Log10LML)   | 0.866        | 0.375        |
|                            | Zscore(Log10LbMxL) | 0.848        | -0.003       |
|                            | Zscore(Log10FW)    | 0.618        | 0.579        |
|                            | Zscore(Log10LbMxW) | 0.594        | 0.137        |
| Leg Morphometric           | Zscore(Log10HiFL)  | 0.812        | 0.482        |
|                            | Zscore(Log10HiTL)  | 0.802        | 0.520        |
| Seta Number                | Zscore(Log10PrS)   | 0.208        | <b>0.921</b> |
|                            | Zscore(Log10HCS)   | 0.228        | 0.860        |
|                            | Zscore(Log10PsS)   | -0.119       | 0.752        |
| % of Variance              |                    | 61.13        | 21.3         |
