# Supplementary material for: Morphometric Analysis of Coptotermes spp. Soldier Caste (Blattodea: Rhinotermitidae) in Indonesia and Evidence of Coptotermes gestroi Extreme Head-Capsule Shapes
Source: Insects. 2021 May 20;12(5):477. doi: 10.3390/insects12050477 (PMC8160883; doi:10.3390/insects12050477)
Supplement: Supplementary file 1 [file insects-12-00477-s001.zip › Table S4.pdf]

Table S4. Collinearity diagnostics conducted by Linear Regression analysis. Tolerance value < 0.1 or VIF > 10.00 explained collinearity. Head width character was treated as dependent variable.

| Characters                          | Collinearity |        |
|-------------------------------------|--------------|--------|
|                                     | Statistics   |        |
|                                     | Tolerance    | VIF    |
| Zscore(Log10HLM)                    | 0.071        | 14.020 |
| Zscore(Log10HLBM)                   | 0.048        | 21.046 |
| Zscore(Log10HWBM)                   | 0.054        | 18.389 |
| Zscore(Log10LML)                    | 0.081        | 12.347 |
| Zscore(Log10HHt)                    | 0.078        | 12.763 |
| Zscore(Log10PsMxW)                  | 0.143        | 7.014  |
| Zscore(Log10PrMdL)                  | 0.015        | 66.422 |
| Zscore(Log10PrMxL)                  | 0.013        | 77.871 |
| Zscore(Log10PrMxW)                  | 0.015        | 68.208 |
| Zscore(Log10MsMxW)                  | 0.019        | 51.326 |
| Zscore(Log10MtMxW)                  | 0.042        | 23.588 |
| Zscore(Log10HiFL)                   | 0.088        | 11.364 |
| Zscore(Log10HiTL)                   | 0.065        | 15.375 |
| Dependent Variable: Zscore(Log10HW) |              |        |
