# Supplementary material for: Morphometric Analysis of Coptotermes spp. Soldier Caste (Blattodea: Rhinotermitidae) in Indonesia and Evidence of Coptotermes gestroi Extreme Head-Capsule Shapes
Source: Insects. 2021 May 20;12(5):477. doi: 10.3390/insects12050477 (PMC8160883; doi:10.3390/insects12050477)
Supplement: Supplementary file 1 [file insects-12-00477-s001.zip › Table S5.pdf]

Table S5. Collinearity diagnostics conducted by Linear Regression analysis. Tolerance value < 0.1 or VIF > 10.00 explained collinearity. Head width character was treated as dependent variable.

| Characters                     | Collinearity Statistics |              |
|--------------------------------|-------------------------|--------------|
|                                | Tolerance               | VIF          |
| Zscore(Log10PsMxW)             | <b>0.172</b>            | <b>5.817</b> |
| Zscore(Log10PrMdL)             | 0.035                   | 28.490       |
| Zscore(Log10PrMxL)             | 0.023                   | 42.877       |
| Zscore(Log10PrMxW)             | 0.016                   | 61.696       |
| Zscore(Log10MsMxW)             | 0.024                   | 40.831       |
| Zscore(Log10MtMxW)             | 0.048                   | 20.736       |
| Dependent Variable: Head Width |                         |              |
