# Supplementary material for: Morphometric Analysis of Coptotermes spp. Soldier Caste (Blattodea: Rhinotermitidae) in Indonesia and Evidence of Coptotermes gestroi Extreme Head-Capsule Shapes
Source: Insects. 2021 May 20;12(5):477. doi: 10.3390/insects12050477 (PMC8160883; doi:10.3390/insects12050477)
Supplement: Supplementary file 1 [file insects-12-00477-s001.zip › Table S6.pdf]

Table S6. Rotated Component Matrix by Varimax. Two components were extracted. Five sets of character were explained. Total % of Variance covered were 76.79%.

| Sets of Character          | Characters         | Component |        |
|----------------------------|--------------------|-----------|--------|
|                            |                    | 1         | 2      |
| Head Capsule Morphometric  | Zscore(Log10PrMxW) | 0.979     | -0.041 |
|                            | Zscore(Log10PrMxL) | 0.967     | -0.030 |
|                            | Zscore(Log10MsMxW) | 0.964     | -0.068 |
|                            | Zscore(Log10PrMdL) | 0.956     | -0.005 |
|                            | Zscore(Log10MtMxW) | 0.937     | -0.053 |
| Labium Morphometric        | Zscore(Log10HW)    | 0.966     | -0.031 |
|                            | Zscore(Log10HHt)   | 0.896     | -0.141 |
|                            | Zscore(Log10HLM)   | 0.892     | -0.344 |
|                            | Zscore(Log10HWBM)  | 0.884     | -0.072 |
|                            | Zscore(Log10HLBM)  | 0.883     | -0.041 |
| Trunk Morphometric         | Zscore(Log10BML)   | 0.505     | -0.656 |
|                            | Zscore(Log10PsMxW) | 0.915     | 0.061  |
|                            | Zscore(Log10PsMnW) | 0.779     | 0.414  |
| Head Features Morphometric | Zscore(Log10PsAW)  | 0.615     | 0.373  |
|                            | Zscore(Log10LbMxW) | 0.822     | 0.104  |
|                            | Zscore(Log10LML)   | 0.784     | -0.121 |
|                            | Zscore(Log10LbMxL) | 0.478     | 0.556  |
| Leg Morphometric           | Zscore(Log10HiTL)  | 0.810     | 0.266  |
|                            | Zscore(Log10HiFL)  | 0.770     | 0.157  |
| Seta Number                | Zscore(Log10PrS)   | -0.664    | 0.175  |
| % of Variance              |                    | 69.98     | 6.81   |
