# Supplementary material for: Morphometric Analysis of Coptotermes spp. Soldier Caste (Blattodea: Rhinotermitidae) in Indonesia and Evidence of Coptotermes gestroi Extreme Head-Capsule Shapes
Source: Insects. 2021 May 20;12(5):477. doi: 10.3390/insects12050477 (PMC8160883; doi:10.3390/insects12050477)
Supplement: Supplementary file 1 [file insects-12-00477-s001.zip › Table S7.pdf]

Table S7. The classification results obtained by discriminant function analysis for all of the species. Original and cross-validated classifications were included. Overall, 99.5% of groupings were solved by 11 variables. Cc: *C. curvignathus*; Cg: *C. gestroi*; Cs: *C. sepangensis*; Ce: *C. elisae*.

| Species |   | Predicted Group Membership |      |     |     | Total |
|---------|---|----------------------------|------|-----|-----|-------|
|         |   | Cc                         | Cg   | Cs  | Ce  |       |
| Cc      |   | 62                         | 0    | 0   | 4   | 66    |
|         | % | 93.9                       | 0    | 0   | 6.1 | 100   |
| Cg      |   | 0                          | 83   | 1   | 0   | 83    |
|         | % | 0                          | 98.8 | 1.2 | 0   | 100   |
| Cs      |   | 0                          | 0    | 63  | 0   | 63    |
|         | % | 0                          | 0    | 100 | 0   | 100   |
| Ce      |   | 0                          | 0    | 0   | 10  | 10    |
|         | % | 0                          | 0    | 0   | 100 | 100   |
