# Supplementary material for: Morphometric Analysis of Coptotermes spp. Soldier Caste (Blattodea: Rhinotermitidae) in Indonesia and Evidence of Coptotermes gestroi Extreme Head-Capsule Shapes
Source: Insects. 2021 May 20;12(5):477. doi: 10.3390/insects12050477 (PMC8160883; doi:10.3390/insects12050477)
Supplement: Supplementary file 1 [file insects-12-00477-s001.zip › Table S8.pdf]

Table S8. Standardized canonical discriminant matrix of whole species DFA. Two components were extracted. Five sets of character were explained. Total % of Variance covered by two components was 100%.

| Sets of Character    | Characters         | Function     |              |
|----------------------|--------------------|--------------|--------------|
|                      |                    | 1            | 2            |
| Head Capsule morph.  | Zscore(Log10HW)    | <b>0.903</b> | -0.286       |
|                      | Zscore(Log10PrS)   | <b>0.822</b> | -0.216       |
| Seta Number          | Zscore(Log10HCS)   | 0.471        | 0.124        |
|                      | Zscore(Log10PsS)   | -0.162       | -0.148       |
| Labium morph.        | Zscore(Log10PsMdL) | -0.029       | <b>0.897</b> |
|                      | Zscore(Log10PsAW)  | -0.027       | 0.272        |
| Head Features morph. | Zscore(Log10FW)    | 0.059        | -0.395       |
|                      | Zscore(Log10LbMxL) | 0.117        | 0.489        |
| Trunk morph.         | Zscore(Log10TBLH)  | -0.396       | 0.173        |
| % of Variance        |                    | 80.6         | 19.4         |
