# Supplementary material for: Morphometric Analysis of Coptotermes spp. Soldier Caste (Blattodea: Rhinotermitidae) in Indonesia and Evidence of Coptotermes gestroi Extreme Head-Capsule Shapes
Source: Insects. 2021 May 20;12(5):477. doi: 10.3390/insects12050477 (PMC8160883; doi:10.3390/insects12050477)
Supplement: Supplementary file 1 [file insects-12-00477-s001.zip › Table S9.pdf]

**Table S9.** The classification results obtained by discriminant function analysis for *C. gestroi* species with head morphology variation. Original and cross-validated classifications were included. Overall, 82.1% of groupings were step-wisely solved by engaging nine variables. CP: Cipinang; GS: Gunung Sindur; PP: Parung Panjang; CI: Cibinong; KR: Karadenan; BT: Batam; PK: Pondok Kelapa.

| Location |   | Predicted Group Membership |     |      |    |     |    |    | Total |
|----------|---|----------------------------|-----|------|----|-----|----|----|-------|
|          |   | CP                         | GS  | PP   | CI | KR  | BT | PK |       |
| CP       |   | 10                         | 0   | 0    | 0  | 0   | 0  | 0  | 10    |
|          | % | 100                        | 0   | 0    | 0  | 0   | 0  | 0  | 100   |
| GS       |   | 0                          | 9   | 0    | 1  | 0   | 0  | 0  | 10    |
|          | % | 0                          | 90  | 0    | 10 | 0   | 0  | 0  | 100   |
| PP       |   | 0                          | 0   | 8    | 1  | 0   | 1  | 0  | 10    |
|          | % | 0                          | 0   | 80   | 10 | 0   | 10 | 0  | 100   |
| CI       |   | 0                          | 0   | 1    | 15 | 3   | 1  | 0  | 20    |
|          | % | 0                          | 0   | 5    | 75 | 15  | 5  | 0  | 100   |
| KR       |   | 0                          | 0   | 0    | 1  | 9   | 0  | 0  | 10    |
|          | % | 0                          | 0   | 0    | 10 | 90  | 0  | 0  | 100   |
| BT       |   | 1                          | 1   | 2    | 0  | 1   | 9  | 0  | 14    |
|          | % | 7.1                        | 7.1 | 14.3 | 0  | 7.1 | 64 | 0  | 100   |
| PK       |   | 0                          | 0   | 0    | 1  | 0   | 0  | 9  | 10    |
|          | % | 0                          | 0   | 0    | 10 | 0   | 0  | 90 | 100   |
