# Supplementary material for: Morphometric Analysis of Coptotermes spp. Soldier Caste (Blattodea: Rhinotermitidae) in Indonesia and Evidence of Coptotermes gestroi Extreme Head-Capsule Shapes
Source: Insects. 2021 May 20;12(5):477. doi: 10.3390/insects12050477 (PMC8160883; doi:10.3390/insects12050477)
Supplement: Supplementary file 1 [file insects-12-00477-s001.zip › Table S10.pdf]

Table S10. Standardized canonical discriminant matrix by DFA for *C. gestroi* with head morphology variation. Six components were extracted. Six sets of character were explained. Total % of Variance covered by the first two components was 64%.

| Sets of Character      | Characters         | Function |        |        |        |        |        |
|------------------------|--------------------|----------|--------|--------|--------|--------|--------|
|                        |                    | 1        | 2      | 3      | 4      | 5      | 6      |
| Head Capsule morph.    | Zscore(Log10HLM)   | -0.469   | 0.331  | 0.455  | 0.314  | 0.474  | -1.224 |
|                        | Zscore(Log10HW)    | 0.018    | 2.512  | 0.256  | -0.351 | -1.732 | 0.739  |
| Labium features morph. | Zscore(Log10HHt)   | -1.312   | -1.649 | -0.126 | 0.174  | 0.278  | 1.184  |
|                        | Zscore(Log10PsMxW) | 0.204    | 0.365  | -1.418 | 0.138  | 1.241  | -0.145 |
|                        | Zscore(Log10PsMnW) | 0.916    | -0.228 | 0.572  | 0.073  | -0.586 | -0.485 |
| Mandible morph.        | Zscore(Log10PsAW)  | 0.346    | 0.134  | 0.300  | -0.590 | 0.624  | 0.510  |
| Leg morph.             | Zscore(Log10LbMxL) | 0.418    | -0.076 | -0.507 | 0.786  | -0.023 | 0.268  |
| Head Features morph.   | Zscore(Log10HiTL)  | 0.242    | -1.145 | 1.020  | 0.253  | 0.378  | -0.466 |
| Trunk morph.           | Zscore(Log10HLM)   | -0.469   | 0.331  | 0.455  | 0.314  | 0.474  | -1.224 |
| % of Variance          |                    | 35.7     | 28.3   | 19.5   | 8.9    | 6.9    | 0.7    |
