# Supplementary material for: Morphometric Analysis of Coptotermes spp. Soldier Caste (Blattodea: Rhinotermitidae) in Indonesia and Evidence of Coptotermes gestroi Extreme Head-Capsule Shapes
Source: Insects. 2021 May 20;12(5):477. doi: 10.3390/insects12050477 (PMC8160883; doi:10.3390/insects12050477)
Supplement: Supplementary file 1 [file insects-12-00477-s001.zip › Table S11.pdf]

Table S11. The amount of data variance covered by the four highest Canonical Variate produced from CVA of the whole species Head Capsule Shape. The number of iterations is 10,000.

| <b>Component</b> | <b>Eigenvalues</b> | <b>% Variance</b> | <b>Cumulative %</b> |
|------------------|--------------------|-------------------|---------------------|
| 1.               | 17.24663818        | 50.063            | 50.063              |
| 2.               | 11.63894396        | 33.785            | 83.848              |
| 3.               | 4.05184165         | 11.761            | 95.609              |
| 4.               | 1.51264232         | 4.391             | 100.000             |
