# Supplementary material for: Morphometric Analysis of Coptotermes spp. Soldier Caste (Blattodea: Rhinotermitidae) in Indonesia and Evidence of Coptotermes gestroi Extreme Head-Capsule Shapes
Source: Insects. 2021 May 20;12(5):477. doi: 10.3390/insects12050477 (PMC8160883; doi:10.3390/insects12050477)
Supplement: Supplementary file 1 [file insects-12-00477-s001.zip › Table S12.pdf]

Table S12. Head Capsule Shape Classification results by DFA for the whole species. In Head Capsule shape analysis, comparisons were done in pairwise way (CC: *C. curvignathus*; CE: *C. elisae*; CG: *C. gestroi*; CK: *C. kashoveni*; CS: *C. sepangensis*).

| Species | Allocated to |     |     |     |     |
|---------|--------------|-----|-----|-----|-----|
|         | CC           | CE  | CG  | CK  | CS  |
| CC      | 57           | 8   | 3   | 0   | 5   |
| %       | 100          | 14  | 5.3 | 0   | 8.8 |
| CE      | 4            | 10  | 1   | 0   | 0   |
| %       | 40           | 100 | 10  | 0   | 0   |
| CG      | 9            | 2   | 82  | 0   | 5   |
| %       | 11           | 2.4 | 100 | 0   | 6%  |
| CK      | 0            | 0   | 0   | 5   | 2   |
| %       | 0            | 0   | 0   | 100 | 40  |
| CS      | 7            | 0   | 3   | 2   | 56  |
| %       | 12.5         | 0   | 5.4 | 3.4 | 100 |
