# Supplementary material for: Morphometric Analysis of Coptotermes spp. Soldier Caste (Blattodea: Rhinotermitidae) in Indonesia and Evidence of Coptotermes gestroi Extreme Head-Capsule Shapes
Source: Insects. 2021 May 20;12(5):477. doi: 10.3390/insects12050477 (PMC8160883; doi:10.3390/insects12050477)
Supplement: Supplementary file 1 [file insects-12-00477-s001.zip › Table S13.pdf]

Table S13. The amount of data variance covered by three Canonical Variate produced from CVA of the whole species Postmentum Shape. The number of iterations is 10,000.

| <b>Component</b> | <b>Eigenvalues</b> | <b>% Variance</b> | <b>Cumulative %</b> |
|------------------|--------------------|-------------------|---------------------|
| 1.               | 5.15907352         | 62.674            | 62.674              |
| 2.               | 2.56683534         | 31.183            | 93.857              |
| 3.               | 0.35532436         | 4.317             | 98.173              |
| 4.               | 0.15035768         | 1.827             | 100.000             |
