# Supplementary material for: Morphometric Analysis of Coptotermes spp. Soldier Caste (Blattodea: Rhinotermitidae) in Indonesia and Evidence of Coptotermes gestroi Extreme Head-Capsule Shapes
Source: Insects. 2021 May 20;12(5):477. doi: 10.3390/insects12050477 (PMC8160883; doi:10.3390/insects12050477)
Supplement: Supplementary file 1 [file insects-12-00477-s001.zip › Table S14.pdf]

Table S14. Postmentum Shape Classification results by DFA for the whole species. In Postmentum shape analysis, comparisons were done in pairwise way (CC: *C. curvignathus*; CE: *C. elisae*; CG: *C. gestroi*; CK: *C. kashoveni*; CS: *C. sepangensis*).

| Species | Allocated to |      |     |     |     |
|---------|--------------|------|-----|-----|-----|
|         | CC           | CE   | CG  | CK  | CS  |
| CC      | 65           | 8    | 0   | 0   | 0   |
| %       | 100          | 12.3 | 0   | 0   | 0   |
| CE      | 0            | 9    | 0   | 0   | 0   |
| %       | 0            | 100  | 0   | 0   | 0   |
| CG      | 4            | 2    | 80  | 1   | 0   |
| %       | 5            | 2.5  | 100 | 1.3 | 0   |
| CK      | 0            | 0    | 1   | 3   | 2   |
| %       | 0            | 0    | 33  | 100 | 67  |
| CS      | 2            | 1    | 3   | 2   | 58  |
| %       | 3.4          | 1.7  | 5.2 | 3.4 | 100 |
