# Supplementary material for: Morphometric Analysis of Coptotermes spp. Soldier Caste (Blattodea: Rhinotermitidae) in Indonesia and Evidence of Coptotermes gestroi Extreme Head-Capsule Shapes
Source: Insects. 2021 May 20;12(5):477. doi: 10.3390/insects12050477 (PMC8160883; doi:10.3390/insects12050477)
Supplement: Supplementary file 1 [file insects-12-00477-s001.zip › Table S15.pdf]

Table S15. The amount of data variance covered by the four highest Canonical Variate produced from CVA of the whole species Posmentum Lateral View. The number of iterations is 10,000.

| <b>Component</b> | <b>Eigenvalues</b> | <b>% Variance</b> | <b>Cumulative %</b> |
|------------------|--------------------|-------------------|---------------------|
| 1.               | 6.70251598         | 65.816            | 65.816              |
| 2.               | 2.07432538         | 20.369            | 86.186              |
| 3.               | 0.93942409         | 9.225             | 95.410              |
| 4.               | 0.46739724         | 4.590             | 100.000             |
