# Supplementary material for: Morphometric Analysis of Coptotermes spp. Soldier Caste (Blattodea: Rhinotermitidae) in Indonesia and Evidence of Coptotermes gestroi Extreme Head-Capsule Shapes
Source: Insects. 2021 May 20;12(5):477. doi: 10.3390/insects12050477 (PMC8160883; doi:10.3390/insects12050477)
Supplement: Supplementary file 1 [file insects-12-00477-s001.zip › Table S16.pdf]

Table S16. Postmentum lateral view classification results by DFA for the whole species. In Head Capsule shape analysis, comparisons were done in pairwise way (CC: *C. curvignathus*; CE: *C. elisae*; CG: *C. gestroi*; CK: *C. kashoveni*; CS: *C. sepangensis*)..

| Species | Allocated to |      |      |      |      |
|---------|--------------|------|------|------|------|
|         | CC           | CE   | CG   | CK   | CS   |
| CC      | 33           | 7    | 9    | 2    | 2    |
| %       | 100          | 21.2 | 27.3 | 6.1  | 6.1  |
| CE      | 0            | 4    | 1    | 0    | 1    |
| %       | 8            | 100  | 25   | 0    | 25   |
| CG      | 12.7         | 1    | 82   | 0    | 3    |
| %       | 11           | 1.6  | 100  | 0    | 4.8% |
| CK      | 1            | 1    | 0    | 5    | 3    |
| %       | 25           | 25   | 0    | 100  | 75   |
| CS      | 3            | 0    | 3    | 4    | 56   |
| %       | 9.1          | 0    | 9.1  | 12.1 | 100  |
