# Supplementary material for: Morphometric Analysis of Coptotermes spp. Soldier Caste (Blattodea: Rhinotermitidae) in Indonesia and Evidence of Coptotermes gestroi Extreme Head-Capsule Shapes
Source: Insects. 2021 May 20;12(5):477. doi: 10.3390/insects12050477 (PMC8160883; doi:10.3390/insects12050477)
Supplement: Supplementary file 1 [file insects-12-00477-s001.zip › Table S17 & S18.pdf]

Table S17. Pairwise distance matrix (uncorrected p-distances %) for all the 12S sequence used in this study.

| Samples                                         | 1     | 23*   | 2     | 24*   | 3     | 25*   | 4     | 26*   | 5     | 27*   | 6     | 28*   | 7     | 29*   | 8     | 30*   | 9     | 10    | 11    | 12    | 13    | 14    | 15 | 16 | 17 | 18 | 19 | 20 | 21 | 22 |
|-------------------------------------------------|-------|-------|-------|-------|-------|-------|-------|-------|-------|-------|-------|-------|-------|-------|-------|-------|-------|-------|-------|-------|-------|-------|----|----|----|----|----|----|----|----|
| 1 CPCG001INA_C._gestroi_Cipinang                |       |       |       |       |       |       |       |       |       |       |       |       |       |       |       |       |       |       |       |       |       |       |    |    |    |    |    |    |    |    |
| 2 PKCG002INA_C._gestroi_Pondokkelapa            | 0.000 |       |       |       |       |       |       |       |       |       |       |       |       |       |       |       |       |       |       |       |       |       |    |    |    |    |    |    |    |    |
| 3 GSCG001INA_C._gestroi_Gunungsindur            | 0.005 | 0.005 |       |       |       |       |       |       |       |       |       |       |       |       |       |       |       |       |       |       |       |       |    |    |    |    |    |    |    |    |
| 4 CICG001INA_C._gestroi_Cibinong                | 0.005 | 0.005 | 0.000 |       |       |       |       |       |       |       |       |       |       |       |       |       |       |       |       |       |       |       |    |    |    |    |    |    |    |    |
| 5 BTCTG001INA_C._gestroi_Batam                  | 0.007 | 0.007 | 0.002 | 0.002 |       |       |       |       |       |       |       |       |       |       |       |       |       |       |       |       |       |       |    |    |    |    |    |    |    |    |
| 6 KRCG001INA_C._gestroi_Karadenan               | 0.005 | 0.005 | 0.000 | 0.000 | 0.002 |       |       |       |       |       |       |       |       |       |       |       |       |       |       |       |       |       |    |    |    |    |    |    |    |    |
| 7 PPCG001INA_C._gestroi_Parungpanjang           | 0.005 | 0.005 | 0.000 | 0.000 | 0.002 | 0.000 |       |       |       |       |       |       |       |       |       |       |       |       |       |       |       |       |    |    |    |    |    |    |    |    |
| 8 BTCTG002INA_C._gestroi_Batam                  | 0.002 | 0.002 | 0.002 | 0.002 | 0.005 | 0.002 | 0.002 |       |       |       |       |       |       |       |       |       |       |       |       |       |       |       |    |    |    |    |    |    |    |    |
| 9 KU925205.1_C._gestroi                         | 0.005 | 0.005 | 0.005 | 0.005 | 0.007 | 0.005 | 0.005 | 0.002 |       |       |       |       |       |       |       |       |       |       |       |       |       |       |    |    |    |    |    |    |    |    |
| 10 KU925208.1_C._heimi                          | 0.017 | 0.017 | 0.017 | 0.017 | 0.020 | 0.017 | 0.017 | 0.015 | 0.017 |       |       |       |       |       |       |       |       |       |       |       |       |       |    |    |    |    |    |    |    |    |
| 11 KU925206.1_C._heimi                          | 0.012 | 0.012 | 0.012 | 0.012 | 0.015 | 0.012 | 0.012 | 0.010 | 0.012 | 0.005 |       |       |       |       |       |       |       |       |       |       |       |       |    |    |    |    |    |    |    |    |
| 12 SICG001INA_C._curvignathus_Simeulue          | 0.032 | 0.032 | 0.032 | 0.032 | 0.034 | 0.032 | 0.032 | 0.029 | 0.027 | 0.034 | 0.029 |       |       |       |       |       |       |       |       |       |       |       |    |    |    |    |    |    |    |    |
| 13 KBCC001INA_C._curvignathus_Karimunbesar      | 0.037 | 0.037 | 0.037 | 0.037 | 0.039 | 0.037 | 0.037 | 0.034 | 0.032 | 0.039 | 0.034 | 0.005 |       |       |       |       |       |       |       |       |       |       |    |    |    |    |    |    |    |    |
| 14 PPCC001INA_C._curvignathus_Parungpanjang     | 0.037 | 0.037 | 0.037 | 0.037 | 0.039 | 0.037 | 0.037 | 0.034 | 0.032 | 0.039 | 0.034 | 0.005 | 0.000 |       |       |       |       |       |       |       |       |       |    |    |    |    |    |    |    |    |
| 15 ASCG003INA_C._elisae_Asmat                   | 0.034 | 0.034 | 0.034 | 0.034 | 0.037 | 0.034 | 0.034 | 0.032 | 0.029 | 0.037 | 0.032 | 0.002 | 0.002 | 0.002 |       |       |       |       |       |       |       |       |    |    |    |    |    |    |    |    |
| 16 KU925201.1_C._elisae                         | 0.032 | 0.032 | 0.032 | 0.032 | 0.034 | 0.032 | 0.032 | 0.029 | 0.027 | 0.034 | 0.029 | 0.005 | 0.005 | 0.005 | 0.002 |       |       |       |       |       |       |       |    |    |    |    |    |    |    |    |
| 17 SICS001INA_C._sepangensis_Simeulue           | 0.025 | 0.025 | 0.020 | 0.020 | 0.022 | 0.020 | 0.020 | 0.022 | 0.025 | 0.027 | 0.022 | 0.029 | 0.029 | 0.029 | 0.029 | 0.027 | 0.029 |       |       |       |       |       |    |    |    |    |    |    |    |    |
| 18 BTCS001INA_C._sepangensis_Batam              | 0.025 | 0.025 | 0.020 | 0.020 | 0.022 | 0.020 | 0.020 | 0.022 | 0.025 | 0.027 | 0.022 | 0.029 | 0.029 | 0.029 | 0.029 | 0.027 | 0.029 | 0.000 |       |       |       |       |    |    |    |    |    |    |    |    |
| 19 KU925215.1_C._sepangensis                    | 0.025 | 0.025 | 0.020 | 0.020 | 0.022 | 0.020 | 0.020 | 0.022 | 0.025 | 0.027 | 0.022 | 0.029 | 0.029 | 0.029 | 0.029 | 0.027 | 0.029 | 0.000 | 0.000 |       |       |       |    |    |    |    |    |    |    |    |
| 20 PPCK001INA_C._kalshoveni_Parungpanjang       | 0.032 | 0.032 | 0.032 | 0.032 | 0.034 | 0.032 | 0.032 | 0.029 | 0.032 | 0.034 | 0.029 | 0.029 | 0.029 | 0.029 | 0.029 | 0.027 | 0.029 | 0.015 | 0.015 | 0.015 |       |       |    |    |    |    |    |    |    |    |
| 21 KU925210.1_C._kalshoveni                     | 0.032 | 0.032 | 0.032 | 0.032 | 0.034 | 0.032 | 0.032 | 0.029 | 0.032 | 0.034 | 0.029 | 0.037 | 0.037 | 0.037 | 0.034 | 0.037 | 0.012 | 0.012 | 0.012 | 0.007 |       |       |    |    |    |    |    |    |    |    |
| 22 KU925209.1_C._kalshoveni                     | 0.032 | 0.032 | 0.032 | 0.032 | 0.034 | 0.032 | 0.032 | 0.029 | 0.032 | 0.034 | 0.029 | 0.037 | 0.037 | 0.037 | 0.034 | 0.037 | 0.012 | 0.012 | 0.012 | 0.007 | 0.000 |       |    |    |    |    |    |    |    |    |
| 23 WYCF001JP_C._formosanus_Wakayama             | 0.027 | 0.027 | 0.027 | 0.027 | 0.029 | 0.027 | 0.027 | 0.025 | 0.027 | 0.034 | 0.029 | 0.037 | 0.037 | 0.037 | 0.034 | 0.037 | 0.022 | 0.022 | 0.022 | 0.022 | 0.025 | 0.025 |    |    |    |    |    |    |    |    |
| 24 AB626145.1_C._formosanus                     | 0.027 | 0.027 | 0.027 | 0.027 | 0.029 | 0.027 | 0.027 | 0.025 | 0.027 | 0.034 | 0.029 | 0.037 | 0.037 | 0.037 | 0.034 | 0.037 | 0.022 | 0.022 | 0.022 | 0.022 | 0.025 | 0.025 |    |    |    |    |    |    |    |    |
| 25 AB626147.1_C._formosanus                     | 0.027 | 0.027 | 0.027 | 0.027 | 0.029 | 0.027 | 0.027 | 0.025 | 0.027 | 0.034 | 0.029 | 0.037 | 0.037 | 0.037 | 0.034 | 0.037 | 0.022 | 0.022 | 0.022 | 0.022 | 0.025 | 0.025 |    |    |    |    |    |    |    |    |
| 26 KU925227.1_Heterotermes_malabaricus          | 0.037 | 0.037 | 0.037 | 0.037 | 0.039 | 0.037 | 0.037 | 0.034 | 0.037 | 0.039 | 0.034 | 0.049 | 0.054 | 0.054 | 0.051 | 0.049 | 0.032 | 0.032 | 0.032 | 0.034 | 0.029 | 0.029 |    |    |    |    |    |    |    |    |
| 27 KU925235.1_Heterotermes_validus              | 0.042 | 0.042 | 0.042 | 0.042 | 0.044 | 0.042 | 0.042 | 0.039 | 0.042 | 0.039 | 0.034 | 0.049 | 0.054 | 0.054 | 0.051 | 0.054 | 0.032 | 0.032 | 0.032 | 0.034 | 0.034 | 0.034 |    |    |    |    |    |    |    |    |
| 28 KP026256.1_Prorethotermes_canalifrons        | 0.103 | 0.103 | 0.108 | 0.108 | 0.110 | 0.108 | 0.108 | 0.105 | 0.108 | 0.103 | 0.108 | 0.120 | 0.125 | 0.125 | 0.123 | 0.123 | 0.110 | 0.110 | 0.110 | 0.115 | 0.115 | 0.115 |    |    |    |    |    |    |    |    |
| 29 MK541931.1_Reticulitermes_leptomandibularis  | 0.074 | 0.074 | 0.069 | 0.069 | 0.071 | 0.069 | 0.069 | 0.071 | 0.069 | 0.076 | 0.074 | 0.078 | 0.083 | 0.083 | 0.081 | 0.081 | 0.071 | 0.071 | 0.071 | 0.078 | 0.083 | 0.083 |    |    |    |    |    |    |    |    |
| 30 CIOJ001INA_Odontotermes_sp.                  | 0.093 | 0.093 | 0.093 | 0.093 | 0.096 | 0.093 | 0.093 | 0.091 | 0.093 | 0.091 | 0.088 | 0.103 | 0.108 | 0.108 | 0.105 | 0.105 | 0.091 | 0.091 | 0.091 | 0.096 | 0.098 | 0.098 |    |    |    |    |    |    |    |    |
| 24* AB626145.1_C._formosanus                    | 0.000 |       |       |       |       |       |       |       |       |       |       |       |       |       |       |       |       |       |       |       |       |       |    |    |    |    |    |    |    |    |
| 25* AB626147.1_C._formosanus                    | 0.000 | 0.000 |       |       |       |       |       |       |       |       |       |       |       |       |       |       |       |       |       |       |       |       |    |    |    |    |    |    |    |    |
| 26* KU925227.1_Heterotermes_malabaricus         | 0.032 | 0.032 | 0.032 |       |       |       |       |       |       |       |       |       |       |       |       |       |       |       |       |       |       |       |    |    |    |    |    |    |    |    |
| 27* KU925235.1_Heterotermes_validus             | 0.037 | 0.037 | 0.037 | 0.039 |       |       |       |       |       |       |       |       |       |       |       |       |       |       |       |       |       |       |    |    |    |    |    |    |    |    |
| 28* KP026256.1_Prorethotermes_canalifrons       | 0.098 | 0.098 | 0.098 | 0.115 | 0.108 |       |       |       |       |       |       |       |       |       |       |       |       |       |       |       |       |       |    |    |    |    |    |    |    |    |
| 29* MK541931.1_Reticulitermes_leptomandibularis | 0.074 | 0.074 | 0.074 | 0.086 | 0.078 | 0.120 |       |       |       |       |       |       |       |       |       |       |       |       |       |       |       |       |    |    |    |    |    |    |    |    |
| 30* CIOJ001INA_Odontotermes_sp.                 | 0.088 | 0.088 | 0.088 | 0.096 | 0.083 | 0.135 | 0.105 |       |       |       |       |       |       |       |       |       |       |       |       |       |       |       |    |    |    |    |    |    |    |    |

Table S18. Pairwise distance matrix (uncorrected p-distances %) for all the 16S sequence used in this study.

[illegible]
